# Supplementary material
Source: PubMed Central journal article supplement (PMC3014228)
Supplement: pp.110.165886_1.pdf [file pp.110.165886_1.pdf]

Appendix I & II are reproduced from Zhu X-G, Portis Jr. AR, Long SP (2004). *Plant Cell Environ* 27: 155-165

Appendix I. Equations used to simulate leaf and canopy net photosynthetic carbon uptake.

$$\Gamma^* = \frac{0.5O_i}{\tau} \quad (1)$$

$$A = \left(1 - \frac{\Gamma^*}{C_i}\right) \min(W_c, W_j) - R_d \quad (2)$$

$$W_c = \frac{V_{cmax} C_i}{C_i + K_m^c (1 + O_i/K_m^o)} \quad (3)$$

$$W_j = \frac{JC_i}{4.5C_i + 10.5\Gamma^*} \quad (4)$$

$$g_s = g_0 + \frac{g_1 AH_{ra}}{C_a} \quad (5)$$

$$O_i = O_a \text{ (At } 25^\circ\text{C)} \quad (6)$$

$$J = \{I_2 + J_{max} - [(I_2 + J_{max})^2 - 4\Theta I_2 J_{max}]^{0.5}\} / 2\Theta \quad (7)$$

$$I_2 = I_0(1-s)(1-r)/2 \quad (8)$$

$$A_c = f[I_{sun}, T_a, C_i, O_i].F_{sun} + f[I_{shade}, T_a, C_i, O_i].F_{shade} \quad (9)$$

Where  $f$  indicates a function as described in equations 1~7.

$$F_{sun} = [1 - e^{(-kF/\cos\theta)}] \cos\theta/k \quad (10)$$

$$F_{shade} = F - F_{sun} \quad (11)$$

$$k = \frac{(x^2 + \tan^2 \theta)^{0.5} \cos \theta}{x + 1.744(x + 1.882)^{-0.733}} \quad (12)$$

$$\cos \theta = \sin \Omega \sin \delta + \cos \Omega \cos \delta \cos(15[t - t_{sn}]) \quad (13)$$

$$\delta = -23.5 \cos[360(D_j + 10)/365] \quad (14)$$

$$I_{dir} = I_s \cdot \alpha^{[(P/P_0)/\cos \theta]} \quad (15)$$

$$I_{diff} = 0.5 I_s (1 - \alpha^{[(P/P_0)/\cos \theta]}) \cos \theta \quad (16)$$

$$I_{shade} = I_{diff} \cdot e^{(-0.5F^{0.7})} + I_{scat} \quad (17)$$

$$I_{scat} = 0.07 I_{dir} (1.1 - 0.1F) e^{-\cos \theta} \quad (18)$$

$$I_{sun} = I_{dir} \cos \lambda / \cos \theta + I_{shade} \quad (19)$$

$$\lambda = \cos^{-1} k \quad (20)$$

## Appendix II

Definition of symbols. Values in parenthesis are those used in simulations, unless stated otherwise

---

| Term        | Units                                | Definition                                                                           |
|-------------|--------------------------------------|--------------------------------------------------------------------------------------|
| $A$         | $\mu\text{mol m}^{-2} \text{s}^{-1}$ | Photosynthetic $\text{CO}_2$ uptake rate                                             |
| $A_c$       | $\mu\text{mol m}^{-2} \text{s}^{-1}$ | Canopy carbon uptake per meter square ground area per second                         |
| $A_{sat}$   | $\mu\text{mol m}^{-2} \text{s}^{-1}$ | Light saturated rate of leaf photosynthetic rate                                     |
| $A_c^1$     | $\text{mmol m}^{-2} \text{d}^{-1}$   | $A_c$ integrated over the course of one day                                          |
| $C_a$       | $\mu\text{mol mol}^{-1}$             | Atmospheric $\text{CO}_2$ concentration                                              |
| $C_i$       | $\mu\text{mol mol}^{-1}$             | Intercellular $\text{CO}_2$ concentration                                            |
| $D_j$       | day of year                          | The $i^{\text{th}}$ Day in a year (200)                                              |
| $F$         | $\text{m}^2 \text{m}^{-2}$           | Total leaf area index, <i>i.e.</i> , the ratio of leaf area per unit ground area (3) |
| $F_{shade}$ | $\text{m}^2 \text{m}^{-2}$           | $F$ that is shaded at any point in time                                              |
| $F_{sun}$   | $\text{m}^2 \text{m}^{-2}$           | $F$ that is sunlit at any point in time                                              |
| $g_0$       | $\text{mmol m}^{-2} \text{s}^{-1}$   | Stomatal conductance coefficient $g_0$ (81.1)                                        |
| $g_1$       | $\text{mmol mol}^{-1}$               | Stomatal conductance coefficient $g_1$ (9580)                                        |
| $g_s$       | $\text{mmol m}^{-2} \text{s}^{-1}$   | Stomatal conductance                                                                 |
| $H_{ra}$    | dimensionless                        | Relative humidity of the atmosphere surrounding the leaf                             |
| $I$         | $\mu\text{mol m}^{-2} \text{s}^{-1}$ | Photon flux density                                                                  |

---

---

|                    |                                      |                                                                                                                              |
|--------------------|--------------------------------------|------------------------------------------------------------------------------------------------------------------------------|
| $I_o$              | $\mu\text{mol m}^{-2} \text{s}^{-1}$ | Incident photon flux density of diffuse radiation                                                                            |
| $I_{\text{dir}}$   | $\mu\text{mol m}^{-2} \text{s}^{-1}$ | Photon flux density of direct radiation                                                                                      |
| $I_s$              | $\mu\text{mol m}^{-2} \text{s}^{-1}$ | Solar constant, <i>i.e.</i> , the photon flux density in a plane perpendicular to the solar beam above the atmosphere (2600) |
| $I_{\text{scat}}$  | $\mu\text{mol m}^{-2} \text{s}^{-1}$ | Photon flux density of scattered radiation within the canopy                                                                 |
| $I_{\text{shade}}$ | $\mu\text{mol m}^{-2} \text{s}^{-1}$ | Mean I for shaded leaves within a canopy                                                                                     |
| $I_{\text{sun}}$   | $\mu\text{mol m}^{-2} \text{s}^{-1}$ | Mean I for sunlit leaves within a canopy                                                                                     |
| $I_2$              | $\mu\text{mol m}^{-2} \text{s}^{-1}$ | Photon flux density absorbed by PSII                                                                                         |
| $J$                | $\mu\text{mol m}^{-2} \text{s}^{-1}$ | Potential rate of whole chain electron transport through PSII for a given $I_2$                                              |
| $J_{\text{max}}$   | $\mu\text{mol m}^{-2} \text{s}^{-1}$ | Light saturated J (180)                                                                                                      |
| $k$                | Dimensionless                        | Foliar absorption coefficient                                                                                                |
| $K_m^c$            | $\mu\text{mol mol}^{-1}$             | Rubisco Michaelis-Menten constant for $\text{CO}_2$ (460 for the control)                                                    |
| $K_m^o$            | $\text{mmol mol}^{-1}$               | Rubisco Michaelis-Menten constant for $\text{O}_2$ (330 for the control)                                                     |
| $O_a$              | $\text{mmol mol}^{-1}$               | Atmospheric $\text{O}_2$ concentration (210)                                                                                 |
| $O_i$              | $\text{mmol mol}^{-1}$               | Intercellular $\text{O}_2$ concentration (210)                                                                               |
| $P$                | kPa                                  | Atmospheric pressure                                                                                                         |
| $P_o$              | kPa                                  | Standard atmospheric pressure at sea level (101.324)                                                                         |
| $r$                | Dimensionless                        | Percent of light that is reflected and transmitted (23%)                                                                     |
| $R_d$              | $\mu\text{mol m}^{-2} \text{s}^{-1}$ | Dark respiration rate (0)                                                                                                    |
| $s$                | dimensionless                        | Spectral imbalance (0.25), indicating the percentage of light                                                                |

---

---

|                   |                                      |                                                                                                                                |
|-------------------|--------------------------------------|--------------------------------------------------------------------------------------------------------------------------------|
|                   |                                      | energy that can not be used in photochemistry                                                                                  |
| t                 | hour                                 | Time of day                                                                                                                    |
| t <sub>sn</sub>   | hour                                 | Time of solar noon (12)                                                                                                        |
| T <sub>a</sub>    | °C                                   | Air temperature (25)                                                                                                           |
| V <sub>cmax</sub> | μmol m <sup>-2</sup> s <sup>-1</sup> | Maximum rate of carboxylation at RuBP and CO <sub>2</sub> saturation (70)                                                      |
| W <sub>c</sub>    | μmol m <sup>-2</sup> s <sup>-1</sup> | Rubisco-limited rate of carboxylation                                                                                          |
| W <sub>j</sub>    | μmol m <sup>-2</sup> s <sup>-1</sup> | RubP-limited rate of carboxylation                                                                                             |
| x                 | dimensionless                        | The ratio of horizontal:vertical projected area of a canopy (1)                                                                |
| Γ*                | μmol mol <sup>-1</sup>               | CO <sub>2</sub> compensation point in the absence of dark respiration                                                          |
| τ                 | dimensionless                        | The specificity of Rubisco for CO <sub>2</sub> relative to O <sub>2</sub> (92.5)                                               |
| α                 | dimensionless                        | Atmospheric transmittance (0.85)                                                                                               |
| Θ                 | dimensionless                        | Convexity factor for the non-rectangular hyperbolic response of electron transport through photosystem II to photon flux (0.7) |
| δ                 | Degree                               | Solar declination                                                                                                              |
| Ω                 | °                                    | Latitude (52)                                                                                                                  |
| θ                 | °                                    | Solar zenith angle                                                                                                             |
| λ                 | °                                    | Angle between leaf surface and the direct beam solar radiation                                                                 |

---
